# Supplementary material
Source: MDPI journal article supplement (https://www.mdpi.com/1424-2818/15/4/483)
Supplement: s1 [file s1]

## Supplementary Materials

**Table S1.** List of the primers used in this study.

| Gene | Primer                                                                            | Reference |
|------|-----------------------------------------------------------------------------------|-----------|
| COI  | LCO1490 (f) 5'-GGT CAA CAA ATC ATA AAG ATA TTG G-3'                               | [97]      |
|      | HCO2198 (r) 5'-TAA ACT TCA GGG TGA CCA AAA AAT CA-3'                              |           |
| 16S  | ARL (f) 5'-CGC CTG TTT ATC AAA AAC AT-3'                                          | [98]      |
|      | BRH (r) 5'-CCG GTC TGA ACT CAG ATC ACG T-3'                                       |           |
| 18S  | SWAM18S (f) 5'-GAA TGG CTC ATT AAA TCA GTC GAG GTT CCT<br>TAG ATG ATC CAA ATC-3'  | [98]      |
|      | SWAM18S (r) 5'-ATC CTC GTT AAA GGG TTT AAA GTG TAC TC<br>ATT CCA ATT ACG GAG C-3' |           |

**Table S2.** List of used for the molecular analysis species with their accession numbers in GenBank.

| Species name                                                                                                                                                                                                                                                                                                                                                                                   | COI GB             | 16S GB             | 18S GB             |
|------------------------------------------------------------------------------------------------------------------------------------------------------------------------------------------------------------------------------------------------------------------------------------------------------------------------------------------------------------------------------------------------|--------------------|--------------------|--------------------|
| <i>Taylorconcha serpenticola</i>                                                                                                                                                                                                                                                                                                                                                               | DQ076018, DQ076010 |                    |                    |
| <i>Taylorconcha insperata</i>                                                                                                                                                                                                                                                                                                                                                                  | DQ075988, DQ076011 |                    |                    |
| <i>Parabythinella marstoniopsis</i>                                                                                                                                                                                                                                                                                                                                                            | HM234395           |                    | EF070627           |
| <i>Akiyoshia kobayashii</i>                                                                                                                                                                                                                                                                                                                                                                    | AB611823           | AB611822           | AB611820           |
| <i>Erhaia jianouensis</i>                                                                                                                                                                                                                                                                                                                                                                      | AF367652           | AF212894           | AF367688           |
| <i>Moria kikuchii</i>                                                                                                                                                                                                                                                                                                                                                                          | AF213350           | AF212905           | AF212918           |
| <b>Baicaliidae, cluster 1:</b>                                                                                                                                                                                                                                                                                                                                                                 |                    |                    |                    |
| <i>Korotnewia korotnewii</i> , <i>Parabaikalia elata</i> , Z93004, Z93003, Z92999,<br><i>P. oviformis</i> , <i>Godlewskia wrzesniowski</i> , <i>P.</i> Z92998, Z93002, Y15378,<br><i>florii</i> , <i>Pseudobaikalia zachwatkini</i> , <i>K. se-</i> Z93005, Z93006, Z92985,<br><i>menkewitchi</i> , <i>Teratobaikalia macrostoma</i> , Y15377<br><i>Liobaicalia stiedae</i> , <i>Ps. pulla</i> |                    |                    |                    |
| <b>Baicaliidae, cluster 2:</b> <i>T. nana</i> , <i>Baicalia</i> Z92994, Z93009, Z92995,<br><i>dybowskiana</i> , <i>G. pulchella</i> , <i>Ps. contabulata</i> , Z92996, Z92987, Z92986,<br><i>Ps. elegantula</i> , <i>B. turrimiformis</i> , <i>B. carinata</i> , FN185907, FN185880,<br><i>B. dybowskiana</i> spp. HQ1132704                                                                   |                    |                    |                    |
| <i>Amnicola limosa</i>                                                                                                                                                                                                                                                                                                                                                                         | AF213348           | AF212903           | AF212916           |
| <i>Amnicola dalli</i>                                                                                                                                                                                                                                                                                                                                                                          | KU991116           | AY622435           |                    |
| <i>Kolymamnicola wasiliewae</i>                                                                                                                                                                                                                                                                                                                                                                | OQ244086– OQ244093 | OQ211409– OQ211416 | OQ211097– OQ211100 |
